# Supplementary material for: Microbial corrosion behavior of pipeline steels in simulation environment of natural gas transportation pipeline
Source: Royal Society of Chemistry journal article supplement (doi:10.1039/d3ra06940k), 2023-01-01
Supplement: d3ra06940k1.pdf [file d3ra06940k1.pdf]

## Supplementary Materials

### **Microbial corrosion behavior of pipeline steels in simulation environment of natural gas transportation pipeline**

Lixia Zhu<sup>a,c</sup>, Yufei Tang<sup>a,b,\*</sup>, Junyi Jiang<sup>a</sup>, Yuxuan Zhang<sup>a</sup>, Mingxiao Wu<sup>d</sup>, Chen Tang<sup>a,b</sup>, Tao Wu<sup>a,b</sup>, Kang Zhao<sup>a,b</sup>

<sup>a</sup> Department of Materials Science and Engineering, Xi'an University of Technology, Xi'an 710048, PR China

<sup>b</sup> Shaanxi Province Key Laboratory of Corrosion and Protection, Xi'an University of Technology, Xi'an 710048, PR China

<sup>c</sup> CNPC Tubular Goods Research Institute, Xi'an 710077, PR China

<sup>d</sup> State Grid Henan Electric Power Research Institute, Nanyang 450099, PR China

\*Corresponding author: Yufei Tang

E-mail address: yftang@xaut.edu.cn (Y. Tang).

Present address: 5 South Jinhua Road, Xi'an, Shaanxi 710048 PR China.

Tel/fax: +86-29-82312994

Table S1 shows the pipeline corrosion conditions of shale gas fields in two blocks in southwest China (southern Sichuan). The corrosion parameters selected for this work are also from the Changning block. From the table, it can be seen that 20~70°C is the operating temperature range of the gas field pipeline. The subject of this work is to study the corrosion behaviour of microorganisms in natural gas gathering and transportation pipelines. In order to reflect the influence of microorganisms on the corrosion behaviour, it is crucial for the study of microbial corrosion to maintain a high activity level of microorganisms. In this work, three temperatures of 20°C, 40°C and 60°C were selected within the pipeline operating temperature range for SRB culture and the growth curve of SRB was obtained using a spectrophotometer. The results are presented in Figure S1. It can be seen from the figure that the growth of SRB is obviously inhibited at 60°C, and the bacterial growth at 20°C is not as good as that at 40°C. Therefore, 40°C is chosen as the operating temperature of the corrosion test, which not only corresponds to the actual corrosion conditions, but also avoids low bacterial activity, which affects the accuracy of the test.

**Table S1** Corrosion environment table of Changning and Weiyuan shale gas blocks in southern Sichuan

|                   | <b>item</b>            | <b>Changning block</b> | <b>Weiyuan block</b> |
|-------------------|------------------------|------------------------|----------------------|
| Flowback          | SRB content (per/mL)   | Up to 13,000           | 1150~7500            |
| Liquid Components | TGB content (per/mL)   | Up to 9.5              | /                    |
| Service Condition | Temperature (°C)       | 20~70                  |                      |
|                   | Maximum pressure (MPa) | 4~8.5MPa               | 6.4MPa               |
|                   | Velocity of flow (m/s) | 1.0                    | /                    |

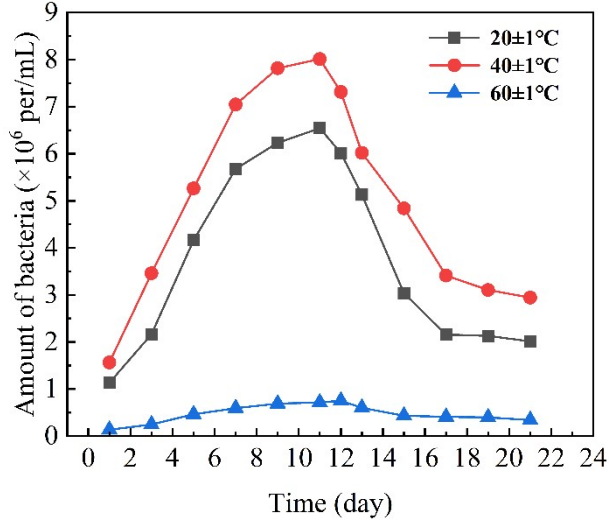

**Figure S1.** Growth curve of SRB in culture medium at different temperatures.

**Table S2** EIS fitting parameters of X80 pipeline steels after corrosion in different microbial environments.

| Group   | Time | $R_s$                          | $Q_{bc}$                                                | $R_{bc}$                       | $Q_{dl}$                                                | $R_{ct}$                       |
|---------|------|--------------------------------|---------------------------------------------------------|--------------------------------|---------------------------------------------------------|--------------------------------|
|         | (d)  | ( $\Omega \cdot \text{cm}^2$ ) | ( $\Omega^{-1} \cdot \text{cm}^{-2} \cdot \text{s}^n$ ) | ( $\Omega \cdot \text{cm}^2$ ) | ( $\Omega^{-1} \cdot \text{cm}^{-2} \cdot \text{s}^n$ ) | ( $\Omega \cdot \text{cm}^2$ ) |
| Control | 1    | 5.4800                         | /                                                       | /                              | $1.645 \times 10^{-2}$                                  | 199.59                         |
|         | 3    | 4.8073                         | /                                                       | /                              | $3.117 \times 10^{-3}$                                  | 80.24                          |
|         | 6    | 6.6499                         | /                                                       | /                              | $1.534 \times 10^{-4}$                                  | 92811                          |
|         | 9    | 38.878                         | /                                                       | /                              | $3.656 \times 10^{-4}$                                  | 42544                          |
|         | 12   | 11.138                         | /                                                       | /                              | $1.379 \times 10^{-4}$                                  | 49700                          |
|         | 15   | 13.092                         | /                                                       | /                              | $6.083 \times 10^{-5}$                                  | 45141                          |
| SRB     | 1    | 4.5064                         | $1.104 \times 10^{-2}$                                  | 6.9296                         | $3.339 \times 10^{-2}$                                  | 929.31                         |
|         | 3    | 3.7152                         | $1.769 \times 10^{-2}$                                  | 2.7584                         | $4.257 \times 10^{-2}$                                  | 192.7                          |
|         | 6    | 4.3723                         | $1.359 \times 10^{-2}$                                  | 6.9781                         | $4.781 \times 10^{-2}$                                  | 321.23                         |
|         | 9    | 7.7396                         | $1.623 \times 10^{-4}$                                  | 69.056                         | $1.119 \times 10^{-4}$                                  | 6816                           |

|         |    |         |                        |        |                        |        |
|---------|----|---------|------------------------|--------|------------------------|--------|
|         | 12 | 8.9653  | $1.694 \times 10^{-4}$ | 167.76 | $6.570 \times 10^{-5}$ | 11266  |
|         | 15 | 9.4464  | $1.249 \times 10^{-4}$ | 582.17 | $5.543 \times 10^{-4}$ | 6830.1 |
| IOB     | 1  | 4.5777  | $4.880 \times 10^{-4}$ | 1.7603 | $1.051 \times 10^{-2}$ | 411.06 |
|         | 3  | 8.9529  | $2.513 \times 10^{-5}$ | 14.043 | $1.468 \times 10^{-4}$ | 53434  |
|         | 6  | 8.4708  | $3.234 \times 10^{-5}$ | 15.479 | $1.124 \times 10^{-4}$ | 91000  |
|         | 9  | 9.7336  | $1.254 \times 10^{-4}$ | 50.457 | $7.638 \times 10^{-5}$ | 80134  |
|         | 12 | 11.566  | $2.378 \times 10^{-5}$ | 10.832 | $1.306 \times 10^{-4}$ | 19197  |
|         | 15 | 10.164  | $1.304 \times 10^{-5}$ | 16.945 | $4.599 \times 10^{-5}$ | 97593  |
| SRB+IOB | 1  | 5.8151  | $1.268 \times 10^{-5}$ | 6.5444 | $2.430 \times 10^{-4}$ | 9641.6 |
|         | 3  | 9.0135  | $1.503 \times 10^{-8}$ | 1.2178 | $2.108 \times 10^{-4}$ | 25086  |
|         | 6  | 9.1589  | $1.411 \times 10^{-5}$ | 10.839 | $6.950 \times 10^{-5}$ | 92438  |
|         | 9  | 9.3000  | $1.054 \times 10^{-4}$ | 43.411 | $6.807 \times 10^{-5}$ | 56010  |
|         | 12 | 10.378  | $2.226 \times 10^{-5}$ | 17.790 | $5.938 \times 10^{-5}$ | 58868  |
|         | 15 | 11.0220 | $2.411 \times 10^{-5}$ | 22.955 | $3.147 \times 10^{-4}$ | 74958  |

**Table S3** Polarization curve parameters of X80 pipeline steels after corrosion for 1, 6, 9 and 15 days in different microbial environments.

| Time (d) | Group   | $\beta_a$ (mV) | $\beta_c$ (mV) | $E_{\text{corr}}$ (V, SCE) | $i_{\text{corr}}$ (A/cm <sup>2</sup> ) |
|----------|---------|----------------|----------------|----------------------------|----------------------------------------|
| 1        | Control | 101.41         | 113.51         | -0.68475                   | $2.7638 \times 10^{-5}$                |
|          | SRB     | 164.86         | 37.736         | -0.75640                   | $2.0242 \times 10^{-5}$                |
|          | IOB     | 105.31         | 80.059         | -0.74381                   | $1.8051 \times 10^{-5}$                |
|          | SRB+IOB | 269.64         | 272.34         | -0.18272                   | $3.5020 \times 10^{-6}$                |
| 3        | Control | 133.69         | 94.479         | -0.61597                   | $3.1481 \times 10^{-5}$                |
|          | SRB     | 109.16         | 49.327         | -0.74486                   | $2.4340 \times 10^{-5}$                |
|          | IOB     | 491.89         | 152.07         | -0.08091                   | $1.8127 \times 10^{-6}$                |
|          | SRB+IOB | 199.00         | 262.35         | -0.13211                   | $4.5975 \times 10^{-6}$                |
| 6        | Control | 382.06         | 124.17         | -0.04826                   | $7.5022 \times 10^{-7}$                |
|          | SRB     | 133.06         | 64.598         | -0.71380                   | $4.2788 \times 10^{-5}$                |
|          | IOB     | 594.85         | 124.19         | -0.07453                   | $8.9359 \times 10^{-7}$                |
|          | SRB+IOB | 2949.3         | 172.40         | -0.09358                   | $1.6205 \times 10^{-6}$                |
| 9        | Control | 1263.0         | 158.87         | -0.12305                   | $2.2376 \times 10^{-6}$                |
|          | SRB     | 540.42         | 131.92         | -0.09088                   | $1.2852 \times 10^{-6}$                |
|          | IOB     | 548.15         | 122.97         | -0.05038                   | $8.2928 \times 10^{-7}$                |
|          | SRB+IOB | 490.70         | 142.41         | -0.05619                   | $1.1666 \times 10^{-6}$                |
| 12       | Control | 678.59         | 110.00         | -0.06281                   | $4.7699 \times 10^{-7}$                |
|          | SRB     | 873.66         | 112.93         | -0.07766                   | $7.3328 \times 10^{-7}$                |

---

|    |         |        |        |         |                         |
|----|---------|--------|--------|---------|-------------------------|
|    | IOB     | 502.79 | 148.51 | 0.05561 | $8.3947 \times 10^{-7}$ |
|    | SRB+IOB | 612.01 | 52.947 | 0.34250 | $4.6417 \times 10^{-7}$ |
| 15 | Control | 880.46 | 118.98 | 0.10696 | $8.5838 \times 10^{-7}$ |
|    | SRB     | 670.20 | 202.19 | 0.11763 | $1.1128 \times 10^{-7}$ |
|    | IOB     | 510.55 | 117.25 | 0.15938 | $3.6799 \times 10^{-7}$ |
|    | SRB+IOB | 658.62 | 119.64 | 0.15337 | $4.3987 \times 10^{-7}$ |

---
